# Supplementary material
Source: PubMed Central journal article supplement (PMC3685270)
Supplement: NIHMS53639-supplement-supporting_info.pdf [file NIHMS53639-supplement-supporting_info.pdf]

**Supplementary Table S1 Adverse events recorded during the study**

| Subject nr. | Tariquidar dose (mg/kg) | Description of adverse event                                       | Severity | Outcome   | Relationship to study drug |
|-------------|-------------------------|--------------------------------------------------------------------|----------|-----------|----------------------------|
| 01          | 3                       | dysgeusia                                                          | mild     | recovered | probable                   |
| 02          | 3                       | vertigo                                                            | mild     | recovered | probable                   |
| 03          | 3                       | pain in right shoulder                                             | mild     | recovered | unlikely                   |
| 06          | 4                       | abdominal discomfort                                               | mild     | recovered | unlikely                   |
| 06          | 4                       | dysgeusia                                                          | mild     | recovered | probable                   |
| 08          | 4                       | hematoma due to arterial cannulation                               | mild     | recovered | not related                |
| 09          | 4                       | event of intermittent ectope atrial rhythm (preexisting condition) | mild     | recovered | not related                |
| 11          | 6                       | multiple hematoma (back and upper arms, due to sports injury)      | mild     | recovered | not related                |
| 12          | 6                       | dysgeusia                                                          | mild     | recovered | probable                   |
| 12          | 6                       | headache                                                           | mild     | recovered | possible                   |
| 13          | 6                       | dysgeusia                                                          | mild     | recovered | probable                   |
| 13          | 6                       | hematoma due to cannulation left cubita and wrist                  | mild     | recovered | not related                |
| 14          | 6                       | dysgeusia                                                          | mild     | recovered | probable                   |
| 14          | 6                       | hematoma due to cannulation left wrist                             | mild     | recovered | not related                |
| 15          | 6                       | hematoma due to cannulation left wrist                             | mild     | recovered | not related                |
| 16          | 8                       | vertigo                                                            | mild     | recovered | possible                   |
| 16          | 8                       | phlebitis left cubita                                              | mild     | recovered | not related                |
| 17          | 8                       | dysgeusia                                                          | mild     | recovered | probable                   |
| 20          | 7.2 <sup>a</sup>        | vertigo                                                            | mild     | recovered | possible                   |
| 20          | 7.2 <sup>a</sup>        | hypotension                                                        | moderate | recovered | possible                   |
| 20          | 7.2 <sup>a</sup>        | bradycardia                                                        | mild     | recovered | possible                   |

<sup>a</sup> Due to moderate hypotension of the subject the tariquidar infusion was discontinued prematurely, resulting in an effective tariquidar dose of 7.2 mg/kg.

**Supplementary Table S2 Tariquidar doses, infusion durations and tariquidar plasma concentrations at start and end of PET scan measured with liquid chromatography tandem mass spectrometry in subjects undergoing PET examination**

| Subject nr.          | Tariquidar dose (mg/kg) | Tariquidar dose (mg) | Duration of infusion (min) | Tariquidar plasma concentration at start of PET (ng/mL) | Tariquidar plasma concentration at end of PET (ng/mL) |
|----------------------|-------------------------|----------------------|----------------------------|---------------------------------------------------------|-------------------------------------------------------|
| pilot 1 <sup>a</sup> | 2                       | 168                  | 30                         | 407                                                     | 535                                                   |
| pilot 2              | 2                       | 140                  | 30                         | 793                                                     | 965                                                   |
| pilot 3              | 2                       | 150                  | 30                         | 416                                                     | 450                                                   |
| pilot 4              | 2                       | 146                  | 30                         | 324                                                     | 281                                                   |
| pilot 5              | 2                       | 137                  | 30                         | 451                                                     | 451                                                   |
| 03                   | 3                       | 192                  | 30                         | n.a. <sup>b</sup>                                       | n.a. <sup>b</sup>                                     |
| 04                   | 3                       | 177                  | 30                         | n.a. <sup>b</sup>                                       | n.a. <sup>b</sup>                                     |
| 05                   | 3                       | 216                  | 30                         | 691                                                     | 581                                                   |
| 08                   | 4                       | 328                  | 87                         | 824                                                     | 525                                                   |
| 09                   | 4                       | 348                  | 93                         | 903                                                     | 845                                                   |
| 10                   | 4                       | 316                  | 84                         | 735                                                     | 604                                                   |
| 13                   | 6                       | 630                  | 168                        | 831                                                     | 923                                                   |
| 14                   | 6                       | 552                  | 147                        | 1,087                                                   | 976                                                   |
| 15                   | 6                       | 552                  | 147                        | 757                                                     | 902                                                   |
| 18                   | 8                       | 512                  | 137                        | 732                                                     | 671                                                   |
| 19                   | 8                       | 608                  | 162                        | 1,312                                                   | 1,241                                                 |
| 20                   | 7.2 <sup>c</sup>        | 603                  | 161                        | 885                                                     | 762                                                   |

n.a., not available

<sup>a</sup> Subjects designated as "pilot" are taken from previous study (17)

<sup>b</sup> Samples lost due to technical failure.

<sup>c</sup> Due to moderate hypotension of the subject the tariquidar infusion was discontinued prematurely, resulting in an effective tariquidar dose of 7.2 mg/kg.
